# Supplementary material
Source: PubMed Central journal article supplement (PMC7003217)
Supplement: Supplemental_material3.pdf [file Supplemental_material3.pdf]

**Supplementary Table 1.** Presenting complaints for the 252 dogs and 126 cats of our urine specific gravity study.

|                                  | Dogs | Cats |
|----------------------------------|------|------|
| Acute kidney injury              | 6    | 5    |
| Adenocarcinoma                   | 0    | 1    |
| Alopecia                         | 1    | 2    |
| Allergic skin disease            | 1    | 1    |
| Ameloblastoma                    | 1    | 0    |
| Anorexia                         | 1    | 0    |
| Apathy                           | 8    | 3    |
| Ascites                          | 2    | 0    |
| Borreliosis                      | 1    | 0    |
| Chronic kidney disease           | 14   | 21   |
| Clinically normal                | 30   | 10   |
| Cystitis                         | 13   | 15   |
| Cystolithiasis                   | 10   | 10   |
| Diabetes                         | 4    | 3    |
| Dyspnea                          | 3    | 0    |
| Ectopic ureter                   | 2    | 0    |
| Epilepsy                         | 9    | 1    |
| Fibrosarcoma                     | 3    | 18   |
| Gastroenteritis                  | 21   | 9    |
| Glioma                           | 4    | 0    |
| Heartworm disease                | 1    | 0    |
| Hemangiosarcoma                  | 1    | 0    |
| Hepatitis                        | 5    | 1    |
| Hyperadrenocorticism             | 20   | 0    |
| Hyperthyroidism                  | 0    | 3    |
| Hypoadrenocorticism              | 3    | 0    |
| Hypothyroidism                   | 1    | 0    |
| Immune-mediated hemolytic anemia | 3    | 0    |
| Leishmaniosis                    | 9    | 0    |

|                          |    |   |
|--------------------------|----|---|
| Leptospirosis            | 1  | 0 |
| Loss of weight           | 5  | 5 |
| Lymphoma                 | 1  | 2 |
| Mast cell tumor          | 6  | 0 |
| Myelofibrosis            | 4  | 0 |
| Neurologic deficit       | 15 | 2 |
| Otitis media             | 1  | 0 |
| Pancreatitis             | 0  | 1 |
| Periodontopathy          | 1  | 3 |
| Patent ductus arteriosus | 1  | 0 |
| Pituitary macroadenoma   | 3  | 0 |
| Polyuria/polydipsia      | 13 | 4 |
| Prostatitis              | 2  | 0 |
| Pyelonephritis           | 1  | 0 |
| Sepsis                   | 1  | 0 |
| Squamous cell carcinoma  | 3  | 2 |
| Thrombocytopenia         | 4  | 1 |
| Ureterolithiasis         | 1  | 3 |
| Urinary incontinence     | 12 | 0 |

**Supplementary Table 2.** Comparisons of agreement between the single-scale and dual-scale refractometers.

|                    | All samples<br>( <i>n</i> = 378) | Dog samples<br>( <i>n</i> = 252) | Cat samples<br>( <i>n</i> = 126) |
|--------------------|----------------------------------|----------------------------------|----------------------------------|
| Fresh native urine |                                  |                                  |                                  |
| Mean difference    | 0.001                            | <0.001                           | 0.003                            |
| 95% LOA            | -0.002 to 0.004                  | -0.001 to 0.002                  | 0.001 to 0.005                   |
| <i>p</i> value     | <0.001                           | <0.001                           | <0.001                           |
| Fresh supernatant  |                                  |                                  |                                  |
| Mean difference    | 0.001                            | <0.001                           | 0.003                            |
| 95% LOA            | -0.002 to 0.004                  | -0.001 to 0.002                  | 0.001 to 0.005                   |
| <i>p</i> value     | <0.001                           | 0.002                            | <0.001                           |

LOA = limits of agreement.
